# Supplementary material for: Three New Plectolyngbya Species (Leptolyngbyaceae, Cyanobacteria) Isolated from Rocks and Saltern of the Republic of Korea
Source: MDPI journal article supplement (doi:10.3390/d14121013), 2022-11-22
Supplement: s1 [file s1]

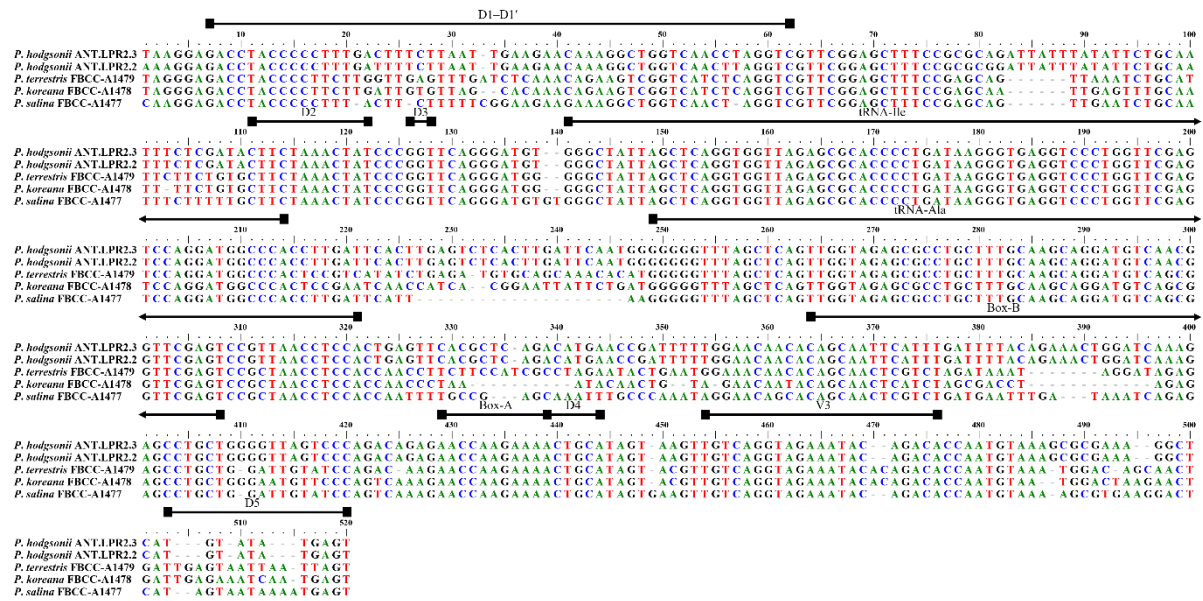

**Supplementary data Figure S1** Alignment of the 16S–23S rRNA internal transcribed spacer (ITS) region from *Plectolyngbya hodgsonii*, *P. terrestris*, *P. koreana*, and *P. salina*. Different conserved domains (D1–D5), tRNA genes, major variable stem V3, and antiterminator (Box-B and Box-A) are indicated by boxes and names. *Plectolyngbya terrestris*, *P. koreana*, and *P. salina* contain both tRNA<sup>Ile</sup> and tRNA<sup>Ala</sup>. All compared sequences contain important structural elements of the ITS as described by Taton *et al.* [9].
